# Supplementary figures and images for: How ambient conditions affect the Leidenfrost temperature
Source: Royal Society of Chemistry journal article supplement (doi:10.1039/d0sm01570a), 2021-01-01

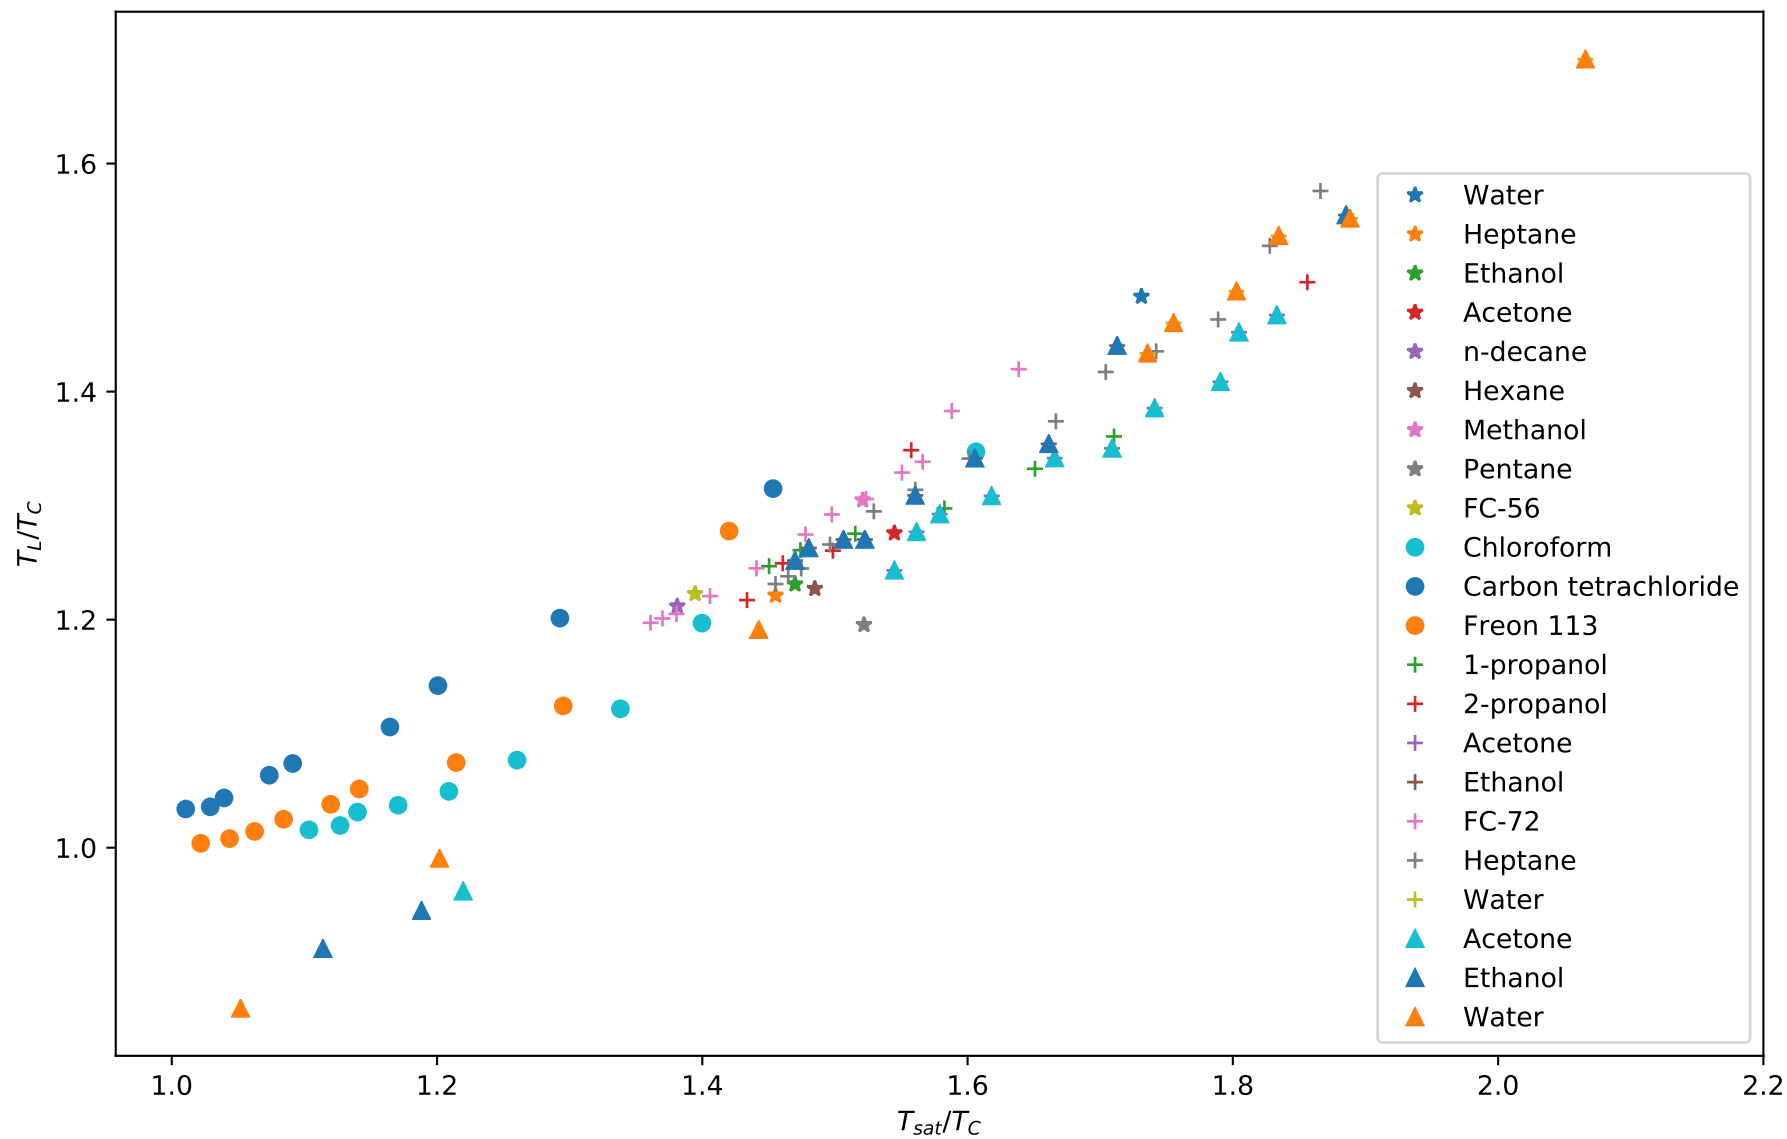

Supplement: d0sm01570a2.pdf [file d0sm01570a2.pdf]
